# Supplementary material for: Whey Protein Reduces Early Life Weight Gain in Mice Fed a High-Fat Diet
Source: PubMed Central journal article supplement (PMC3735523; doi:10.1371/journal.pone.0071439), 2013-08-06

Figure S1. Cluster analysis similarity tree of fecal microbiota.

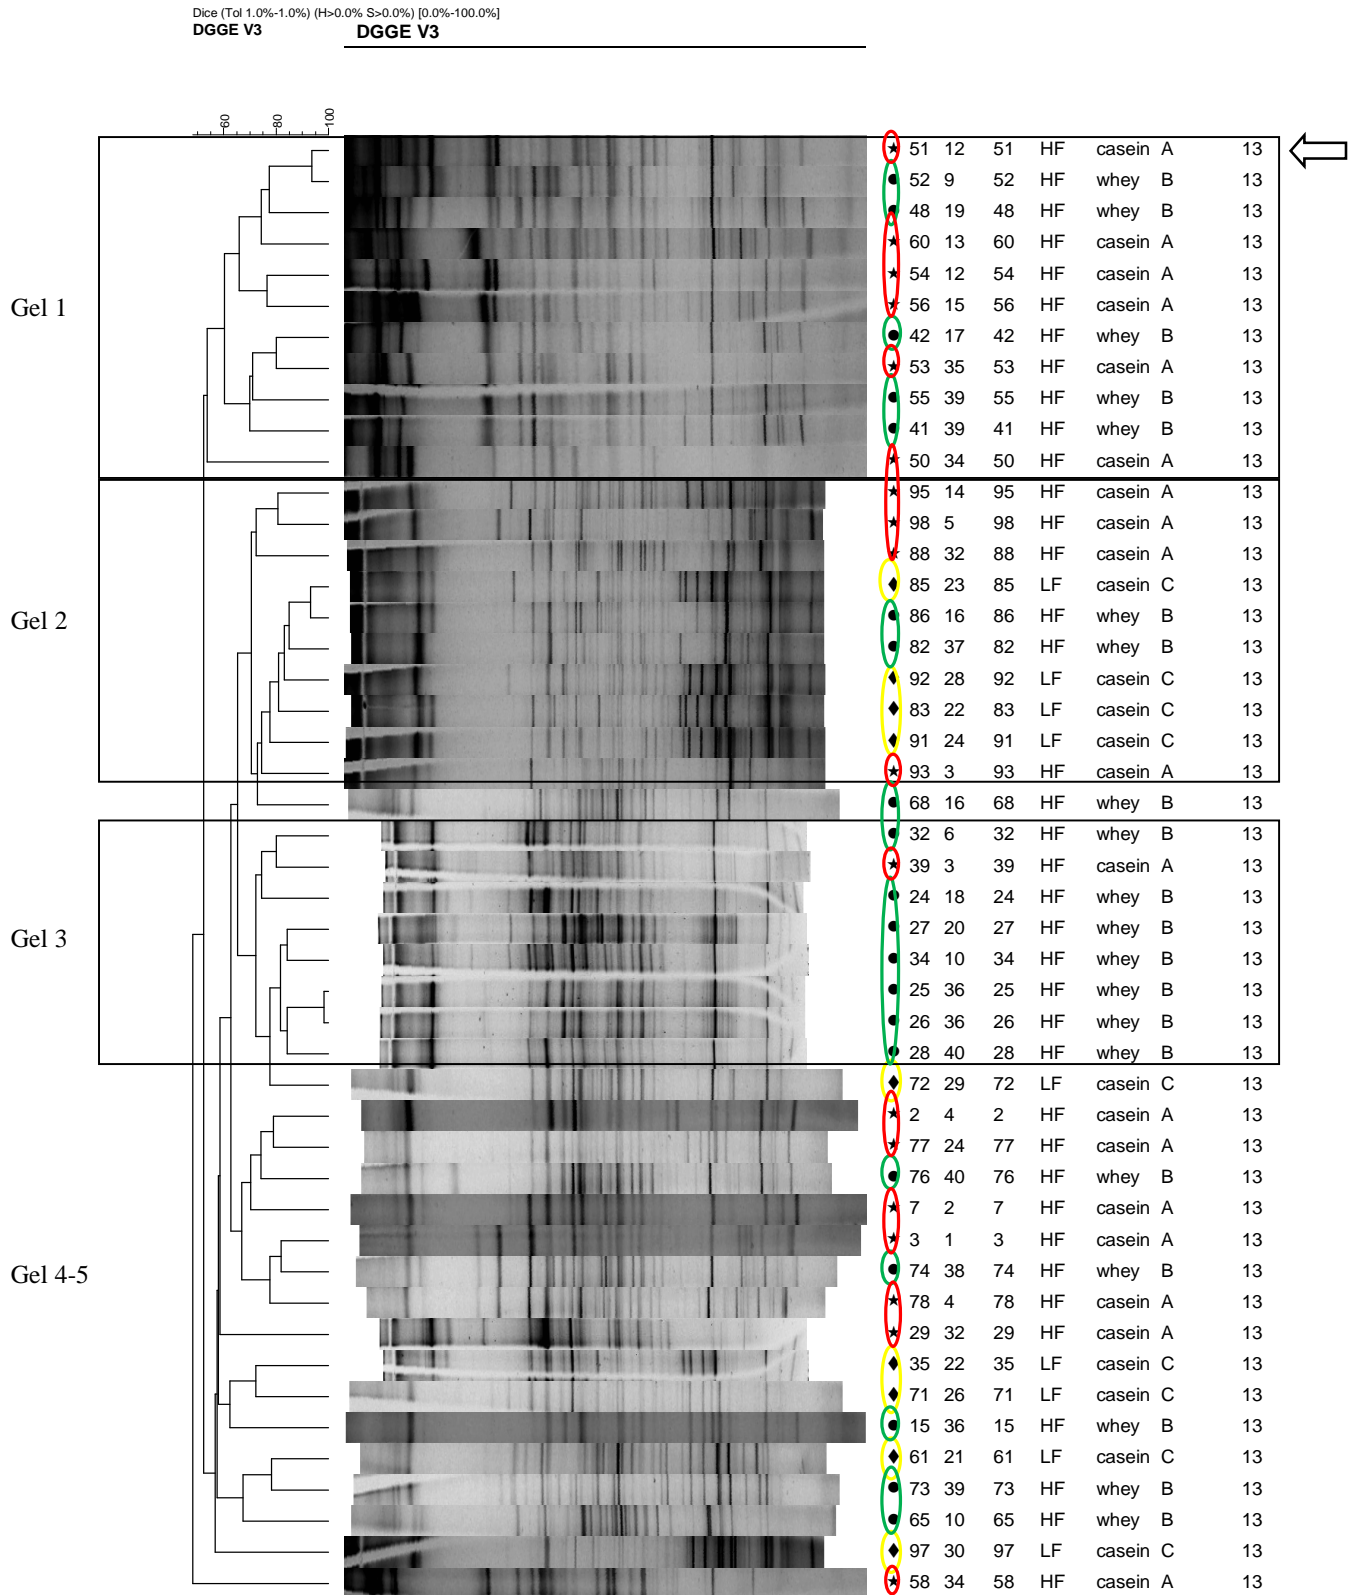

Supplement: pone.0071439.s001.pdf [file pone.0071439.s001.pdf]
